# Supplementary material for: Pressure effect on the magnetism and crystal structure of magnetoelectric metal–organic framework [CH3NH3][Co(HCOO)3]
Source: Royal Society of Chemistry journal article supplement (doi:10.1039/d3cp02311g), 2023-01-01
Supplement: d3cp02311g1.pdf [file d3cp02311g1.pdf]

## Supporting Information for

### Pressure Effect on the Magnetism and Crystal Structure of

### Magnetoelectric Metal-Organic Framework [CH<sub>3</sub>NH<sub>3</sub>][Co(HCOO)<sub>3</sub>]

Houjian Zhou<sup>a</sup>, Hao Ding<sup>a</sup>, Xin Gao<sup>a</sup>, Zhiwei Shen<sup>a</sup>, Kun Zhai<sup>\*a</sup>, Bochong Wang<sup>a</sup>, Congpu Mu<sup>a</sup>, Fusheng Wen<sup>a</sup>, Jianyong Xiang<sup>a</sup>, Tianyu Xue<sup>a</sup>, Yu Shu<sup>\*a</sup>, Lin Wang<sup>a</sup>, Zhongyuan Liu<sup>\*a</sup>

Table S1 The crystallographic information of refined crystal structure

|                          |                                                 |
|--------------------------|-------------------------------------------------|
| Empirical formula        | C <sub>4</sub> H <sub>9</sub> CoNO <sub>6</sub> |
| Formula weight           | 226.05                                          |
| Temperature [K]          | 300                                             |
| Crystal system           | orthorhombic                                    |
| Space group (number)     | <i>Pnma</i> (62)                                |
| <i>a</i> [Å]             | 8.39295(16)                                     |
| <i>b</i> [Å]             | 11.70918(20)                                    |
| <i>c</i> [Å]             | 8.10619(17)                                     |
| $\alpha$ [°]             | 90.0                                            |
| $\beta$ [°]              | 90.0                                            |
| $\gamma$ [°]             | 90.0                                            |
| Volume [Å <sup>3</sup> ] | 796.633(26)                                     |
| Z                        | 4                                               |
| Radiation                | $\lambda = 1.540562$ Å                          |

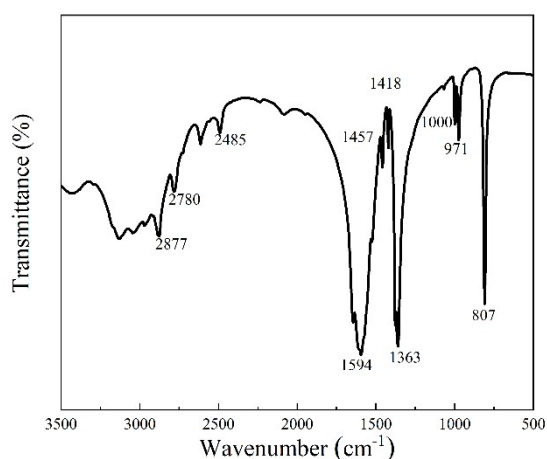

Figure S1 the Infrared spectrum of the [CH<sub>3</sub>NH<sub>3</sub>][Co(COO)<sub>3</sub>] compound recorded at room temperature.

Table S2 Experimental IR and Raman wavenumbers (in  $\text{cm}^{-1}$ ) of  $[\text{CH}_3\text{NH}_3][\text{Co}(\text{HCOO})_3]$  and suggested assignments.

| $[\text{CH}_3\text{NH}_3][\text{Co}(\text{HCOO})_3]$ |        | Assignment                                                 |
|------------------------------------------------------|--------|------------------------------------------------------------|
| IR                                                   | Raman  |                                                            |
| 3121vw                                               |        | $\nu(\text{N} - \text{H})$                                 |
|                                                      | 3051w  | $\nu(\text{NH}_3^+) + \nu(\text{CH}_3)$                    |
| 3031vw                                               |        | $\nu(\text{N} - \text{H})$                                 |
|                                                      | 2979s  | $\nu(\text{CH}_3)$                                         |
| 2963w                                                |        | $\nu(\text{CH}_3)$                                         |
|                                                      | 2903m  | $\nu_1(\text{HCOO}^-)$                                     |
|                                                      | 2893m  | $\nu_1(\text{HCOO}^-)$                                     |
| 2882w                                                | 2879m  | $\nu_1(\text{HCOO}^-)$                                     |
|                                                      | 2826w  | $\nu(\text{NH}_3^+)$                                       |
| 2779w                                                |        | $\nu(\text{C} - \text{H})$                                 |
|                                                      | 2726vw |                                                            |
| 2614w                                                |        | $\nu(\text{NH})$                                           |
| 2489w                                                |        | $\nu(\text{NH})$                                           |
|                                                      | 1646w  | $\nu_4(\text{HCOO}^-) + \delta_{\text{as}}(\text{NH}_3^+)$ |
|                                                      | 1611w  |                                                            |
|                                                      | 1577w  | $\nu_4(\text{HCOO}^-)$                                     |
|                                                      | 1514w  |                                                            |
|                                                      | 1464w  | $\delta_s(\text{NH}_3) + \delta_{\text{as}}(\text{CH}_3)$  |
| 1457m                                                |        | $\nu(\text{CH}_3)$                                         |
| 1418m                                                | 1422w  | $\delta_s(\text{CH}_3)$                                    |
|                                                      | 1380vs | $\nu_5(\text{HCOO}^-)$                                     |
|                                                      | 1373vs | $\nu_5(\text{HCOO}^-)$                                     |
|                                                      | 1368vs | $\nu_5(\text{HCOO}^-)$                                     |
| 1357s                                                | 1388vs | $\nu_2(\text{HCOO}^-)$                                     |
| 1068vw                                               | 1066m  | $\nu_6(\text{HCOO}^-)$                                     |
| 1000m                                                | 998m   | $\nu(\text{C} - \text{N})$                                 |
| 973m                                                 | 972vw  | $\nu(\text{C} - \text{N})$                                 |
| 807s                                                 | 807m   | $\nu_3(\text{HCOO}^-)$                                     |
|                                                      | 803m   | $\nu_3(\text{HCOO}^-)$                                     |

Key: vs, very strong; s, strong; m, medium; w, weak; vw, very weak.

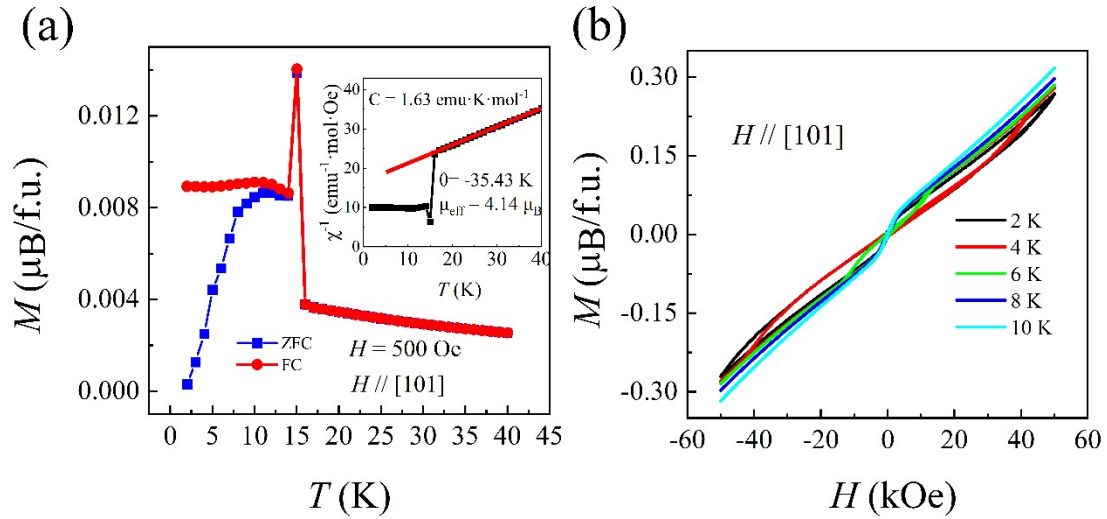

Figure S2 (a) Magnetization as a function of temperature along [101] axis after zero-field cooling (ZFC) and field cooling (FC) process. (b) Field-dependent isothermal magnetization along [101] axis at different temperatures.

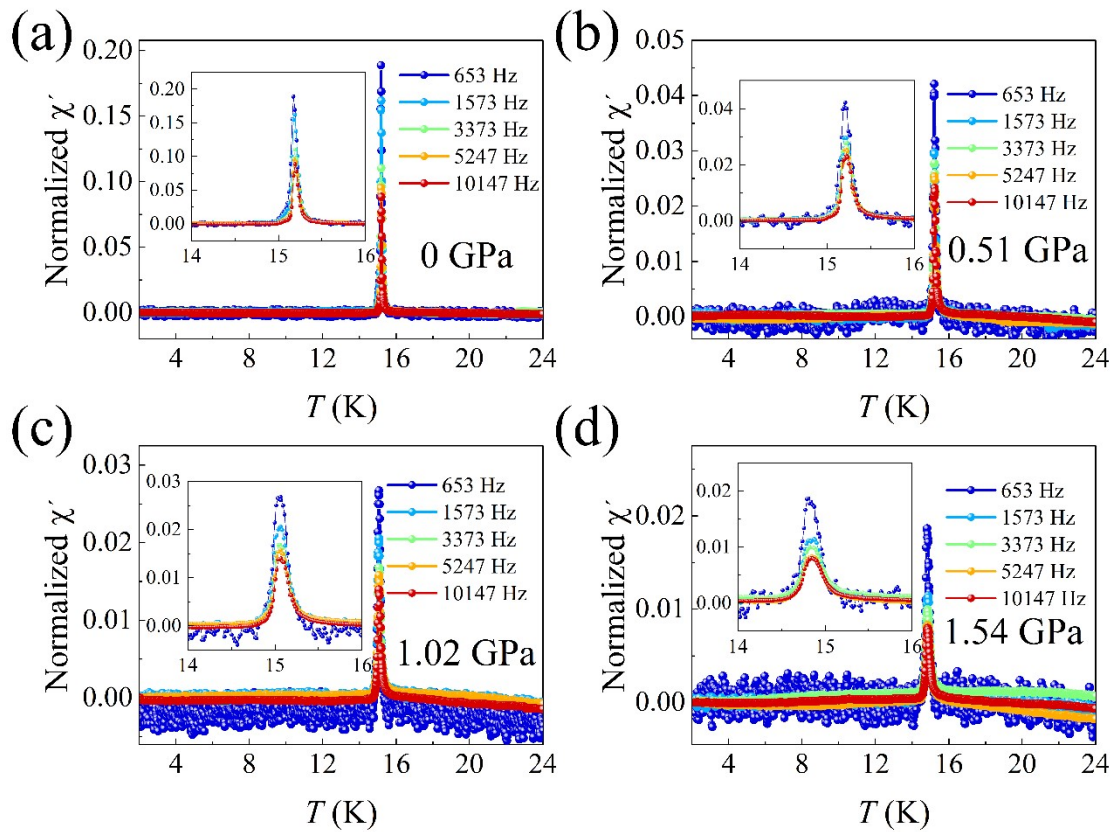

Figure S3 Normalized AC magnetic susceptibility at different frequencies under different pressures of (a) 0GPa, (b) 0.51GPa, (c) 1.02GPa and (d) 1.54GPa.

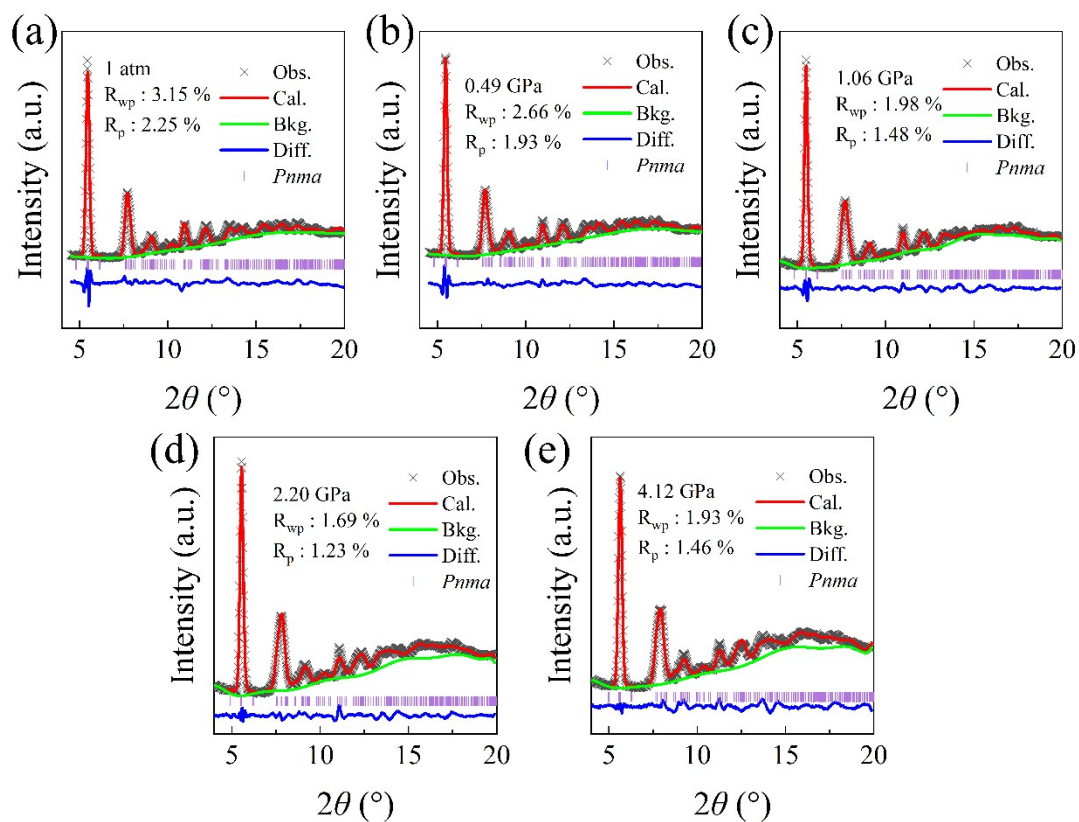

Figure S4 Rietveld refinement of powder XRD patterns at (a) 0, (b) 0.49, (c) 1.60, (d) 2.20, and (e) 4.12 GPa with the  $Pnma$  space group using the GSAS software.

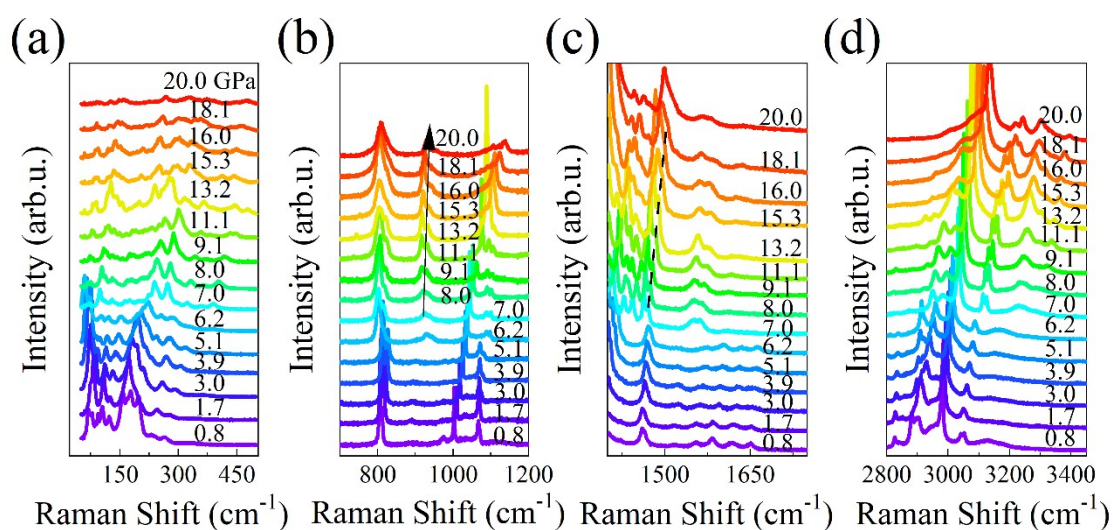

Figure S5 Raman spectra of  $\text{[CH}_3\text{NH}_3\text{][Co(COOH)}_3\text{]}$  single crystal at high pressures in the wavenumber of (a) 50-500  $\text{cm}^{-1}$ , (b) 700-1200  $\text{cm}^{-1}$ , (c) 1400-1700  $\text{cm}^{-1}$ , (d) 2700-3500  $\text{cm}^{-1}$ .

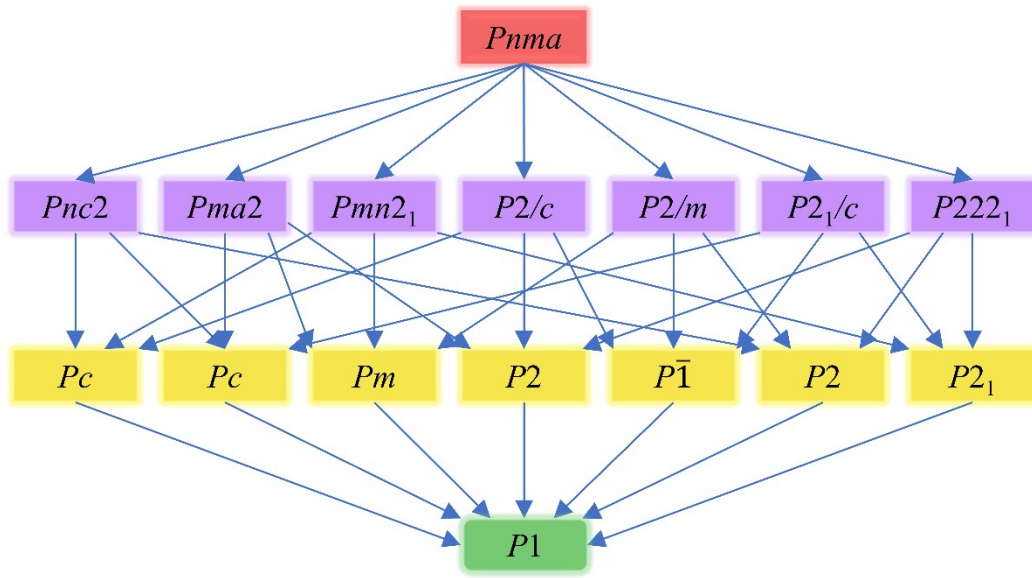

Figure S6 Schematic representation of the subgroup tree.

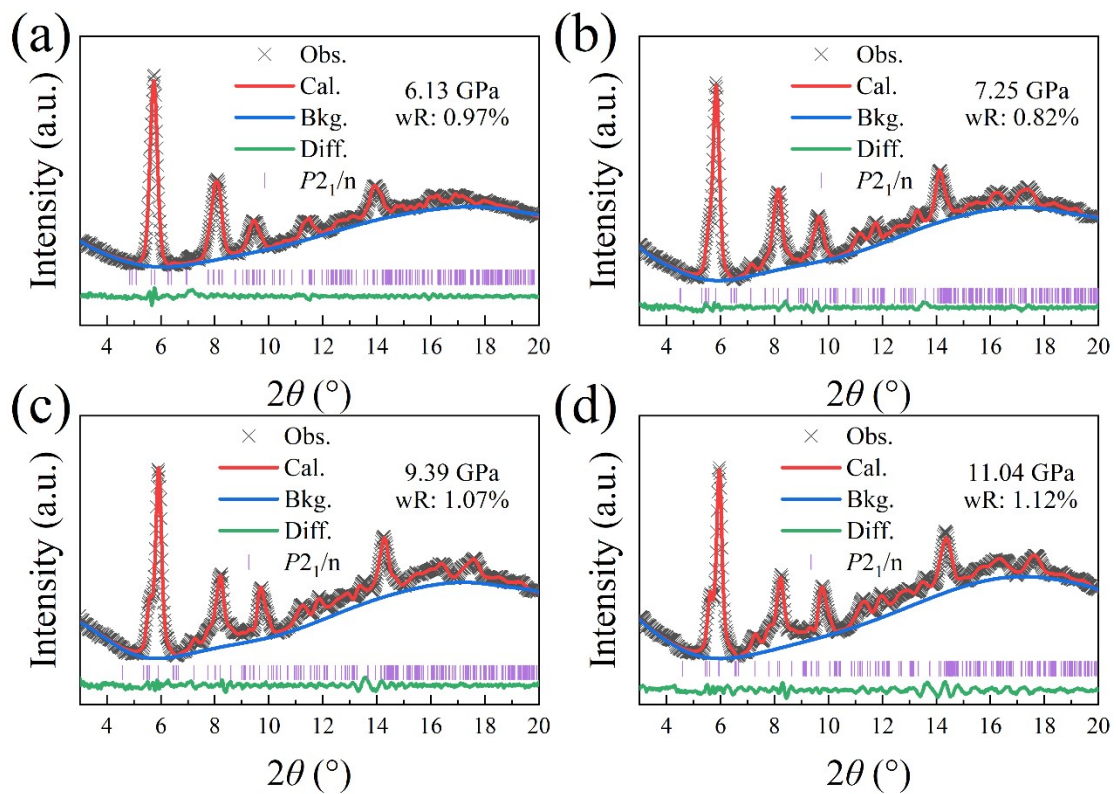

Figure S7 Refinement of powder XRD patterns at (a) 6.1, (b) 7.3, (c) 9.4 and (d) 11.0 GPa by the GSAS II software.

Table S3 Pressure evolution of the bond-length and bond angles of [CH<sub>3</sub>NH<sub>3</sub>][Co(COOH)<sub>3</sub>].

|                 | 0              | 0.49    | 1.06    | 2.20    | 4.12    | 6.13    | 7.25    | 9.39    | 11.04   |
|-----------------|----------------|---------|---------|---------|---------|---------|---------|---------|---------|
| Bond Length (Å) |                |         |         |         |         |         |         |         |         |
| C-O             |                |         |         |         |         | 1.22164 | 1.21615 | 1.21861 | 1.20388 |
|                 |                |         |         |         |         | 1.20095 | 1.20468 | 1.20937 | 1.20938 |
|                 | 1.47           | 1.46006 | 1.46625 | 1.47463 | 1.44262 | 1.2492  | 1.30602 | 1.29744 | 1.29234 |
|                 | 1.83           | 1.83276 | 1.8285  | 1.83431 | 1.79419 | 1.23437 | 1.13502 | 1.12973 | 1.11697 |
|                 | 1.48           | 1.47689 | 1.47138 | 1.47416 | 1.44197 | 1.23996 | 1.28636 | 1.2781  | 1.26758 |
|                 |                |         |         |         |         | 1.22199 | 1.12378 | 1.11955 | 1.11649 |
|                 |                |         |         |         |         | 2.02201 | 2.00391 | 2.00767 | 1.98267 |
|                 |                |         |         |         |         | 2.03631 | 1.9154  | 1.90998 | 1.9079  |
|                 | 1.66           | 1.65711 | 1.64712 | 1.6469  | 1.61101 | 2.09648 | 2.2197  | 2.2038  | 2.194   |
|                 | 2.21           | 2.21    | 2.2018  | 2.2038  | 2.15588 | 2.02853 | 1.89369 | 1.88576 | 1.86275 |
| Co-O            |                |         |         |         |         | 2.02781 | 2.02248 | 2.0296  | 2.03045 |
|                 |                |         |         |         |         | 2.12101 | 2.2449  | 2.2283  | 2.213   |
|                 | Bond Angle (°) |         |         |         |         |         |         |         |         |
| O-C-O           |                |         |         |         |         | 123.298 | 129.969 | 130.363 | 130.409 |
|                 | 122            | 121.416 | 122.066 | 122.234 | 122.259 | 124.392 | 123.457 | 123.224 | 123.51  |
|                 |                |         |         |         |         | 125.219 | 123.832 | 123.5   | 123.153 |
